# Supplementary material for: Whole genome expression profiling using DNA microarray for determining biocompatibility of polymeric surfaces
Source: Royal Society of Chemistry journal article supplement (doi:10.1039/b608239d), 2006-07-26
Supplement: b608239d-tables1.pdf [file b608239d-tables1.pdf]

**Supplementary Table 1**

| Name       | Class           | Description                                                                                                                                                                                       | SU-8 CAN | SU-8  |
|------------|-----------------|---------------------------------------------------------------------------------------------------------------------------------------------------------------------------------------------------|----------|-------|
| AF144054   | Apoptosis       | Homo sapiens apoptosis related protein APR-4 mRNA, partial cds. [AF144054]                                                                                                                        | 3.300    |       |
| BM023129   | Cell cycle      | BM023129 ie79h07.x1 Melton Normalized Human Islet 4 N4-HIS 1 Homo sapiens cDNA clone IMAGE:5673444 3' similar to SW:BUB3_MOUSE Q9WVA3 MITOTIC CHECKPOINT PROTEIN BUB3 ;, mRNA sequence [BM023129] | 0.332    |       |
| TAGLN2     | Differentiation | Homo sapiens transgelin 2 (TAGLN2), mRNA [NM_003564]                                                                                                                                              | 3.349    |       |
| HSPC065    | Heat shock      | Homo sapiens HSPC065 protein (HSPC065), mRNA [NM_014157]                                                                                                                                          | 3.102    |       |
| CCL19      | Ligand          | Homo sapiens chemokine (C-C motif) ligand 19 (CCL19), mRNA [NM_006274]                                                                                                                            | 3.800    |       |
| THC2045396 | Membrane        | O00429 (O00429) Dynamin-like protein, partial (16%) [THC2045396]                                                                                                                                  | 0.131    |       |
| AW075437   | Metabolism      | AW075437 xb23c01.x1 NCI_CGAP_Kid13 Homo sapiens cDNA clone IMAGE:2577120 3' similar to WP:C17G10.8 CE16861 FAT-3: ALCOHOL DEHYDROGENASE ;, mRNA sequence [AW075437]                               | 0.314    |       |
| HAAO       | Metabolism      | Homo sapiens 3-hydroxyanthranilate 3,4-dioxygenase (HAAO), mRNA [NM_012205]                                                                                                                       | 4.733    | 3.885 |
| ABHD9      | Metabolism      | Homo sapiens abhydrolase domain containing 9 (ABHD9), mRNA [NM_024794]                                                                                                                            | 3.689    |       |
| NPEPL1     | Metabolism      | Homo sapiens aminopeptidase-like 1 (NPEPL1), mRNA [NM_024663]                                                                                                                                     | 3.837    | 4.054 |
| PNPO       | Metabolism      | Homo sapiens pyridoxine 5'-phosphate oxidase (PNPO), mRNA [NM_018129]                                                                                                                             | 3.978    |       |
| SLC27A1    | Metabolism      | Homo sapiens solute carrier family 27 (fatty acid transporter), member 1 (SLC27A1), mRNA [NM_198580]                                                                                              | 3.066    |       |
| THC2159243 | Metabolism      | RIB2_HUMAN (P04844) Dolichyl-diphosphooligosaccharide--protein glycosyltransferase 63 kDa subunit precursor (Ribophorin II) (RPN-II) (RIBIIR) , partial (25%) [THC2159243]                        | 0.311    |       |
| THC2200192 | Metabolism      | THU1_HUMAN (Q9NXG2) THUMP domain containing protein 1, partial (69%) [THC2200192]                                                                                                                 | 0.155    |       |
| AI918632   | Metabolism      | ts32h01.x1 NCI_CGAP_Ut4 Homo sapiens cDNA clone IMAGE:2230321 3' similar to gb:X60221 ATP SYNTHASE B CHAIN, MITOCHONDRIAL PRECURSOR (HUMAN);, mRNA sequence [AI918632]                            | 0.118    |       |
| AI267511   | Mitochondria    | AI267511 aq65g08.x1 Stanley Frontal SN pool 2 Homo sapiens cDNA clone IMAGE:2035838 similar to gb:X16560 CYTOCHROME C OXIDASE POLYPEPTIDE VIIC PRECURSOR (HUMAN);, mRNA sequence [AI267511]       | 0.294    |       |
| AI961400   | Mitochondria    | AI961400 wt22a12.x1 NCI_CGAP_Ut1 Homo sapiens cDNA clone IMAGE:2508190 3' similar to gb:X60036 MITOCHONDRIAL PHOSPHATE CARRIER PROTEIN PRECURSOR (HUMAN);, mRNA sequence [AI961400]               | 0.070    |       |
| THC2200745 | Mitochondria    | DAAMTTGRG Damaliscus dorcas mitochondrial 12S and 16S ribosomal RNA genes, and Phe-, Val-, and Leu-tRNA genes, partial (5%) [THC2200745]                                                          | 0.074    |       |
| AI278811   | Oncogene        | AI278811 qo50a11.x1 NCI_CGAP_Co8 Homo sapiens cDNA clone IMAGE:1911932 3' similar to gb:K02276 MYC PROTO-ONCOGENE PROTEIN (HUMAN);, mRNA sequence [AI278811]                                      | 0.164    |       |
| THC2134410 | Oncogene        | AI732190 ae38f11.x5 Gessler Wilms tumor Homo sapiens cDNA clone IMAGE:898125 3', mRNA sequence [AI732190]                                                                                         | 4.095    |       |
| AY117690   | Oncogene        | Homo sapiens lung cancer oncogene 5 (HLC5) mRNA, complete cds. [AY117690]                                                                                                                         | 0.312    |       |
| TMEFF2     | Oncogene        | Homo sapiens mRNA for tomoregulin, complete cds. [AB004064]                                                                                                                                       | 0.305    | 0.104 |

|              |          |                                                                                                                                                                                         |       |       |
|--------------|----------|-----------------------------------------------------------------------------------------------------------------------------------------------------------------------------------------|-------|-------|
| AY170823     | Oncogene | Homo sapiens transformation-related protein 2 mRNA, complete cds. [AY170823]                                                                                                            | 0.303 |       |
| AI457687     | Other    | AI457687 tj48g10.x1 Soares_NSF_F8_9W_OT_PA_P_S1 Homo sapiens cDNA clone IMAGE:2144802 3' similar to TR:O22899 O22899 RNA HELICASE ISOLOG. ;, mRNA sequence [AI457687]                   | 0.276 |       |
| AI937689     | Other    | AI937689 wp82d09.x1 NCI_CGAP_Brn25 Homo sapiens cDNA clone IMAGE:2468273 3' similar to gb:M32886 SORCIN (HUMAN);, mRNA sequence [AI937689]                                              | 0.275 |       |
| ADM          | Other    | Homo sapiens adrenomedullin (ADM), mRNA [NM_001124]                                                                                                                                     | 3.745 |       |
| AF271776     | Other    | Homo sapiens DC48 mRNA, complete cds. [AF271776]                                                                                                                                        | 0.227 |       |
| DPYSL3       | Other    | Homo sapiens dihydropyrimidinase-like 3 (DPYSL3), mRNA [NM_001387]                                                                                                                      | 3.949 |       |
| FTH1         | Other    | Homo sapiens ferritin, heavy polypeptide 1, mRNA (cDNA clone IMAGE:3874046). [BC032091]                                                                                                 | 0.084 |       |
| FTHL7        | Other    | Homo sapiens ferritin, heavy polypeptide-like 7 (FTHL7) on chromosome 13 [NR_002202]                                                                                                    | 0.075 |       |
| XTP7         | Other    | Homo sapiens protein 7 transactivated by hepatitis B virus X antigen (HBxAg) (XTP7), mRNA [NM_138568]                                                                                   | 3.777 | 4.126 |
| SDK2         | Other    | Homo sapiens sidekick homolog 2 (chicken) (SDK2), mRNA [NM_019064]                                                                                                                      | 4.410 | 3.912 |
| AF187554     | Other    | Homo sapiens sperm antigen-36 mRNA, complete cds. [AF187554]                                                                                                                            | 0.182 |       |
| THC2182978   | Other    | TTR320199 immunoglobulin mu heavy chain [Tursiops truncatus] , partial (10%) [THC2182978]                                                                                               | 4.322 |       |
| AD7C-NTP     | Other    | Homo sapiens neuronal thread protein AD7c-NTP (AD7C-NTP), mRNA [NM_014486]                                                                                                              | 3.823 | 3.404 |
| DUB3         | Protease | Homo sapiens deubiquitinating enzyme 3 (DUB3), mRNA [NM_201402]                                                                                                                         | 3.069 |       |
| THC2202467   | Protease | PSA7_HUMAN (O14818) Proteasome subunit alpha type 7 (Proteasome subunit RC6-1) (Proteasome subunit XAPC7) , partial (22%) [THC2202467]                                                  | 0.235 |       |
| AI567808     | Receptor | AI567808 tr62h05.x1 NCI_CGAP_Pan1 Homo sapiens cDNA clone IMAGE:2222937 3' similar to gb:M14043 ANNEXIN II (HUMAN);, mRNA sequence [AI567808]                                           | 0.314 | 0.081 |
| THC2174183   | Receptor | BC012448 thyroid hormone receptor interactor 4 [Homo sapiens] , partial (75%) [THC2174183]                                                                                              | 0.261 |       |
| DKFZp564K142 | Receptor | Homo sapiens implantation-associated protein (DKFZp564K142), mRNA [NM_032121]                                                                                                           | 3.093 |       |
| LENG8        | Receptor | Homo sapiens leukocyte receptor cluster (LRC) member 8 (LENG8), mRNA [NM_052925]                                                                                                        | 3.086 |       |
| KCNK7        | Receptor | Homo sapiens potassium channel, subfamily K, member 7 (KCNK7), transcript variant C, mRNA [NM_005714]                                                                                   | 3.679 | 3.157 |
| AA780485     | Ribosome | ac65f02.s1 Stratagene fetal retina 937202 Homo sapiens cDNA clone IMAGE:867483 3' similar to gb:X69392 60S RIBOSOMAL PROTEIN L26 (HUMAN);, mRNA sequence [AA780485]                     | 0.296 | 0.114 |
| AI613259     | Ribosome | AI613259 ty35c04.x1 NCI_CGAP_Ut2 Homo sapiens cDNA clone IMAGE:2281062 3' similar to gb:X69391 60S RIBOSOMAL PROTEIN L6 (HUMAN);, mRNA sequence [AI613259]                              | 0.265 | 0.071 |
| BQ614035     | Ribosome | BQ614035 il02g06.x1 Human insulinoma Homo sapiens cDNA clone IMAGE:6028979 3' similar to SW:RS11_HUMAN P04643 40S RIBOSOMAL PROTEIN S11. [1] ;, mRNA sequence [BQ614035]                | 0.219 |       |
| RPS15A       | Ribosome | H.sapiens mRNA for ribosomal protein (homologuous to yeast S24). [X62691]                                                                                                               | 0.113 |       |
| RPS15A       | Ribosome | H.sapiens mRNA for ribosomal protein (homologuous to yeast S24). [X62691]                                                                                                               | 0.137 |       |
| THC2194550   | Ribosome | HUMCH13C3A ribosomal protein small subunit [Homo sapiens] , partial (27%) [THC2194550]                                                                                                  | 0.067 |       |
| N75321       | Ribosome | N75321 za79f05.s1 Soares_fetal_lung_NbHL19W Homo sapiens cDNA clone IMAGE:298785 3' similar to SW:RL24_HUMAN P38663 60S RIBOSOMAL PROTEIN L24. [2] PIR:JN0549 ;, mRNA sequence [N75321] | 0.192 |       |
| THC2166330   | Ribosome | RL35_HUMAN (P42766) 60S ribosomal protein L35, partial (67%) [THC2166330]                                                                                                               | 0.299 |       |

|            |                |                                                                                                                                                                                                                  |       |       |
|------------|----------------|------------------------------------------------------------------------------------------------------------------------------------------------------------------------------------------------------------------|-------|-------|
| THC2044542 | Ribosome       | RS10_HUMAN (P46783) 40S ribosomal protein S10, partial (93%) [THC2044542]                                                                                                                                        | 0.193 |       |
| THC2162618 | Ribosome       | RS3A_HUMAN (P61247) 40S ribosomal protein S3a, partial (81%) [THC2162618]                                                                                                                                        | 0.208 | 0.085 |
| AA300289   | Ribosome       | AA300289 EST13009 Uterus tumor I Homo sapiens cDNA 3' end similar to similar to ribosomal protein YL10, mRNA sequence [AA300289]                                                                                 | 0.121 |       |
| HNRPH1     | RNA metabolism | Homo sapiens heterogeneous nuclear ribonucleoprotein H1 (H) (HNRPH1), mRNA [NM_005520]                                                                                                                           | 0.299 |       |
| THC2084699 | RNA metabolism | HSEXPOTI Exportin(tRNA) [Homo sapiens] , partial (13%) [THC2084699]                                                                                                                                              | 0.204 |       |
| THC2083654 | RNA metabolism | PR18_HUMAN (Q99633) Pre-mRNA splicing factor 18 (PRP18 homolog) (hPRP18), partial (31%) [THC2083654]                                                                                                             | 0.286 |       |
| AI608782   | Skeleton       | AI608782 tw94g05.x1 NCI_CGAP_HN6 Homo sapiens cDNA clone IMAGE:2267384 3' similar to gb:K00558 TUBULIN ALPHA-1 CHAIN (HUMAN);, mRNA sequence [AI608782]                                                          | 0.244 |       |
| ACTB       | Skeleton       | Homo sapiens actin, beta (ACTB), mRNA [NM_001101]                                                                                                                                                                | 0.160 |       |
| RASD1      | Skeleton       | Homo sapiens RAS, dexamethasone-induced 1 (RASD1), mRNA [NM_016084]                                                                                                                                              | 4.053 |       |
| TNNI1      | Skeleton       | Homo sapiens troponin I, skeletal, slow (TNNI1), mRNA [NM_003281]                                                                                                                                                | 3.623 | 3.911 |
| THC2087016 | Skeleton       | HUMMYLCC smooth muscle myosin light chain {Homo sapiens} , partial (22%) [THC2087016]                                                                                                                            | 0.295 | 0.129 |
| THC2045155 | Skeleton       | MLRM_HUMAN (P19105) Myosin regulatory light chain 2, nonsarcomeric (Myosin RLC), complete [THC2045155]                                                                                                           | 0.269 |       |
| THC2200669 | Signal         | HNT1_HUMAN (P49773) Histidine triad nucleotide-binding protein 1 (Adenosine 5'-monophosphoramidase) (Protein kinase C inhibitor 1) (Protein kinase C-interacting protein 1) (PKCI-1), partial (51%) [THC2200669] | 0.136 |       |
| ASB16      | Signal         | Homo sapiens ankyrin repeat and SOCS box-containing 16 (ASB16), mRNA [NM_080863]                                                                                                                                 | 4.027 |       |
| CDKAL1     | Signal         | Homo sapiens CDK5 regulatory subunit associated protein 1-like 1 (CDKAL1), mRNA [NM_017774]                                                                                                                      | 3.116 |       |
| FAM19A4    | Signal         | Homo sapiens family with sequence similarity 19 (chemokine (C-C motif)-like), member A4 (FAM19A4), transcript variant 1, mRNA [NM_182522]                                                                        | 3.351 |       |
| FLJ90024   | Signal         | Homo sapiens fasting-inducible integral membrane protein TM6P1 (FLJ90024), mRNA [NM_153342]                                                                                                                      | 4.265 |       |
| ARHGEF15   | Signal         | Homo sapiens Rho guanine nucleotide exchange factor (GEF) 15 (ARHGEF15), mRNA [NM_173728]                                                                                                                        | 3.727 |       |
| SLA        | Signal         | Homo sapiens Src-like-adaptor (SLA), mRNA [NM_006748]                                                                                                                                                            | 3.607 | 4.085 |
| TRH        | Signal         | Homo sapiens thyrotropin-releasing hormone (TRH), mRNA [NM_007117]                                                                                                                                               | 3.015 |       |
| TRAF4      | Signal         | Homo sapiens TNF receptor-associated factor 4 (TRAF4), transcript variant 1, mRNA [NM_004295]                                                                                                                    | 0.323 |       |
| THC2128887 | Signal         | WSB1_HUMAN (Q9Y6I7) WD repeat and SOCS box containing protein 1 (WSB-1) (SOCS box-containing WD protein SWiP-1), partial (55%) [THC2128887]                                                                      | 0.268 | 0.142 |
| THC2162031 | Structure      | TCPH_HUMAN (Q99832) T-complex protein 1, eta subunit (TCP-1-eta) (CCT-eta) (HIV-1 Nef interacting protein), partial (80%) [THC2162031]                                                                           | 0.261 |       |
| HDAC4      | Transcription  | Homo sapiens histone deacetylase 4 (HDAC4), mRNA [NM_006037]                                                                                                                                                     | 3.066 |       |
| JUND       | Transcription  | Homo sapiens jun D proto-oncogene (JUND), mRNA [NM_005354]                                                                                                                                                       | 3.342 |       |
| TIP120A    | Transcription  | Homo sapiens TBP-interacting protein (TIP120A), mRNA [NM_018448]                                                                                                                                                 | 3.298 |       |
| TCF15      | Transcription  | Homo sapiens transcription factor 15 (basic helix-loop-helix) (TCF15), mRNA [NM_004609]                                                                                                                          | 4.081 |       |
| ZNF403     | Transcription  | Homo sapiens zinc finger protein 403 (ZNF403), mRNA [NM_024835]                                                                                                                                                  | 3.413 |       |
| MKRN4      | Transcription  | Makorin 4 (Zinc finger protein 127-Xp) (ZNF127-Xp). [Source:Uniprot/SWISSPROT;Acc:Q13434] [ENST00000355859]                                                                                                      | 3.056 |       |
| THC2203017 | Transcription  | Q08243 (Q08243) CCAAT-binding protein (Fragment), partial (32%) [THC2203017]                                                                                                                                     | 0.295 |       |

|            |               |                                                                                                                                                                          |       |       |
|------------|---------------|--------------------------------------------------------------------------------------------------------------------------------------------------------------------------|-------|-------|
| W45382     | Transcription | W45382 zc80e10.s1 Pancreatic Islet Homo sapiens cDNA clone<br>IMAGE:328650 3' similar to gb:D13748 EUKARYOTIC INITIATION<br>FACTOR 4A-I (HUMAN);, mRNA sequence [W45382] | 0.218 |       |
| THC2022176 | Transcription | AA601920 np02d02.s1 NCI_CGAP_Pr2 Homo sapiens cDNA clone<br>IMAGE:1115139 similar to gb:M90356_cds1 TRANSCRIPTION<br>FACTOR BTF3 (HUMAN);, mRNA sequence [AA601920]      | 0.185 | 0.142 |
| GLTSCR1    | Tumor sup     | Homo sapiens glioma tumor suppressor candidate region gene 1<br>(GLTSCR1), mRNA [NM_015711]                                                                              | 3.986 |       |

---
