# Supplementary figures and images for: Whole genome expression profiling using DNA microarray for determining biocompatibility of polymeric surfaces
Source: Royal Society of Chemistry journal article supplement (doi:10.1039/b608239d), 2006-07-26

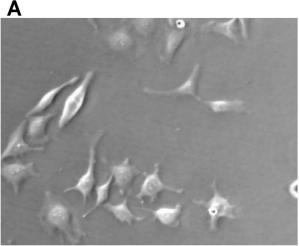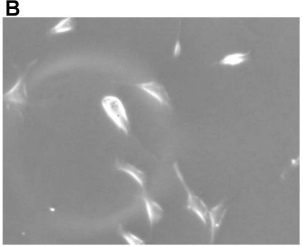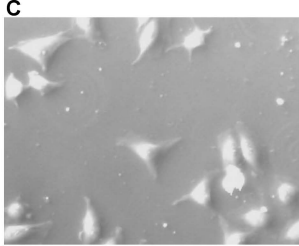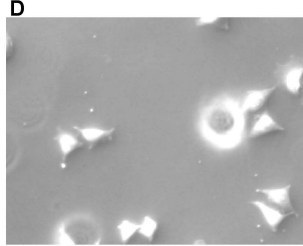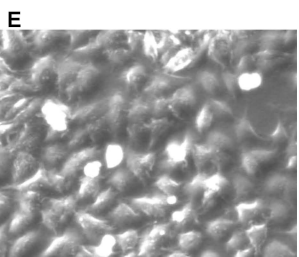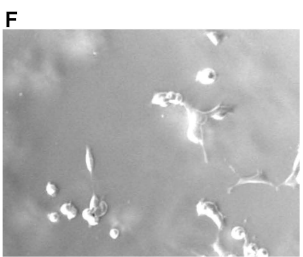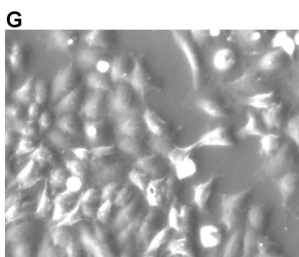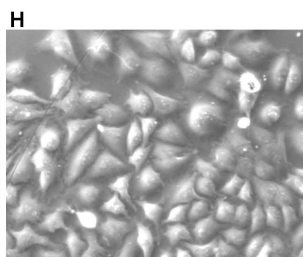

Supplement: b608239d-figs2.pdf [file b608239d-figs2.pdf]
